# Supplementary material for: Treelike two-level PdxAgynanocrystals tailored for bifunctional fuel cell electrocatalysis
Source: Royal Society of Chemistry journal article supplement (doi:10.1039/c8ta11538a), 2019-01-01
Supplement: c8ta11538a1.pdf [file c8ta11538a1.pdf]

## Supporting Information

### Treelike Two-level Pd<sub>x</sub>Ag<sub>y</sub> Nanocrystals Tailored for Bifunctional Fuel

#### Cell Electrocatalysis†

Xian Jiang,<sup>ab</sup> Yuexin Xiong,<sup>b</sup> Yufei Wang,<sup>b</sup> Jiabin Wang,<sup>b</sup> Naixu Li,<sup>a</sup> Jiancheng Zhou,<sup>\*a</sup>  
Gengtao Fu,<sup>\*bc</sup> Dongmei Sun,<sup>b</sup> and Yawen Tang<sup>\*b</sup>

<sup>a</sup>. School of Chemistry and Chemical Engineering, Southeast University, Nanjing, 211189, China. E-mail: jczhou@seu.edu.cn

<sup>b</sup>. Jiangsu Key Laboratory of New Power Batteries, Jiangsu Collaborative Innovation Centre of Biomedical Functional Materials, School of Chemistry and Materials Science, Nanjing Normal University, Nanjing, 210023, P. R. China. Email: tangyawen@njnu.edu.cn and gengtaofu@gmail.com

<sup>c</sup>. School of Chemical and Biomedical Engineering, Nanyang Technological University, Singapore, 637459, Singapore.

## Experimental

### Reagents and Chemicals

Palladium acetate ( $\text{Pd}(\text{O}_2\text{CCH}_3)_2$ ) was obtained from Shanghai Jiuyue Chemical Co. Ltd. Silver nitrate ( $\text{AgNO}_3$ ) was purchased from Sinopharm Chemical Reagent Co. Ltd (Shanghai, China). 1-Naphthol ( $\text{C}_{10}\text{H}_7\text{OH}$ ) was bought from Aladdin. Commercial Pd black was acquired from Johnson Matthey Corporation. All reagents were used as received without further purification.

### Characterizations

The morphology and structure of  $\text{Pd}_x\text{Ag}_y$  NTs were characterized through Transmission electron microscopy (TEM), high-resolution TEM (HRTEM) and high-angle annular dark-field scanning transmission electron microscopy (HAADF-STEM), which were performed on a JEOL JEM-2100F transmission electron microscopy under an accelerating voltage of 200 kV. Scanning electron microscopy (SEM) images and energy-dispersive X-ray (EDX) spectra were acquired on a Hitachi S5500 SEM. X-ray diffraction (XRD) patterns were acquired on a Model D/max-rC X-ray diffractometer using Cu  $K\alpha$  radiation source ( $\lambda = 1.5406 \text{ \AA}$ ) and operating at 40 kV and 100 mA. X-ray photoelectron spectroscopy (XPS) measurements were proceeded on a Thermo VG Scientific ESCALAB 250 spectrometer with a monochromatic Al  $K\alpha$  X-ray source. The binding energy was calibrated by means of the C1s peak energy of 284.6 eV. Fourier transform infrared (FT-IR) was carried out using a Nicolet 520 SXFTIR spectrometer. The chemical composition of  $\text{Pt}_x\text{Ag}_y$  NTs was investigated by EDX technique and inductively coupled plasma atomic emission spectroscopy (ICP-AES).

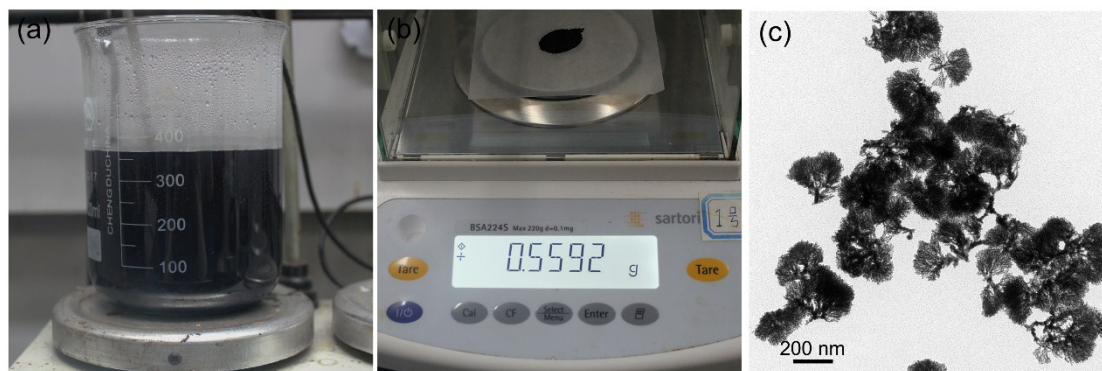

**Fig. S1** (a and b) Digital photos of the large-scale synthesis of  $\text{Pd}_3\text{Ag}_1$  NTs, and (c) TEM image of the  $\text{Pd}_3\text{Ag}_1$  NTs from large-scale synthesis.

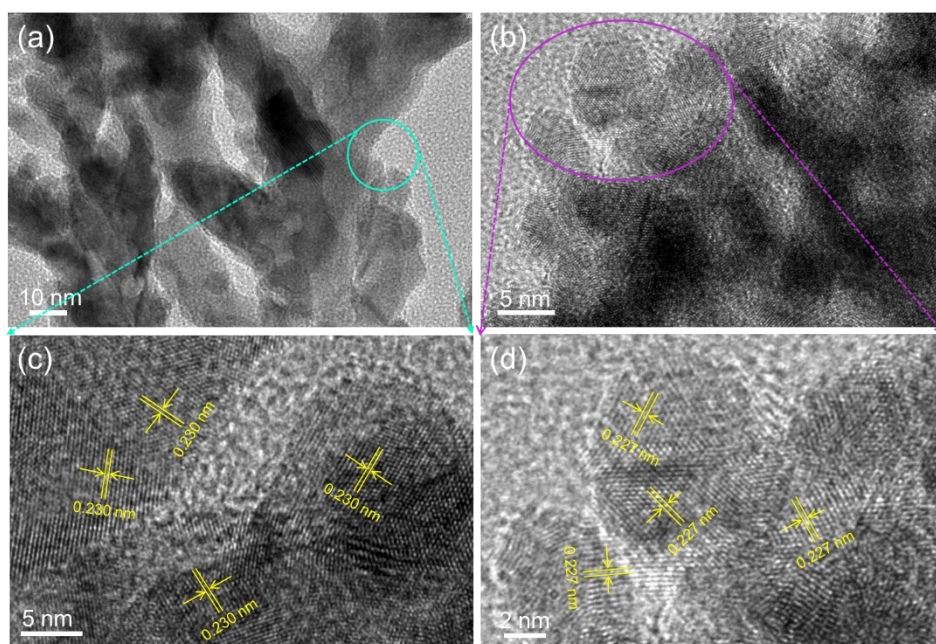

**Fig. S2** TEM images and HRTEM images of the branches (a and c) and dendrites (b and d) in a  $\text{Pd}_3\text{Ag}_1$  NT.

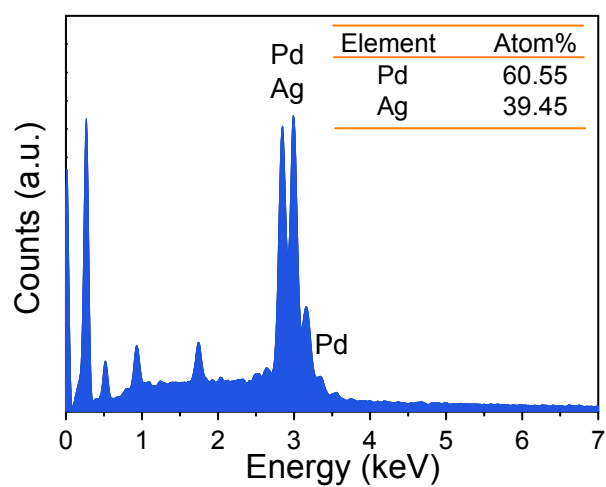

**Fig. S3** EDX spectrum of Pd<sub>3</sub>Ag<sub>1</sub> NTs.

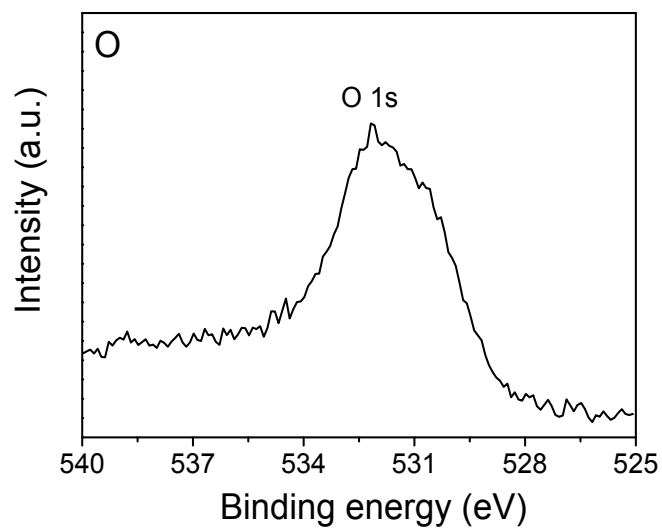

**Fig. S4** XPS spectrum of Pd<sub>3</sub>Ag<sub>1</sub> NTs in O 1s region.

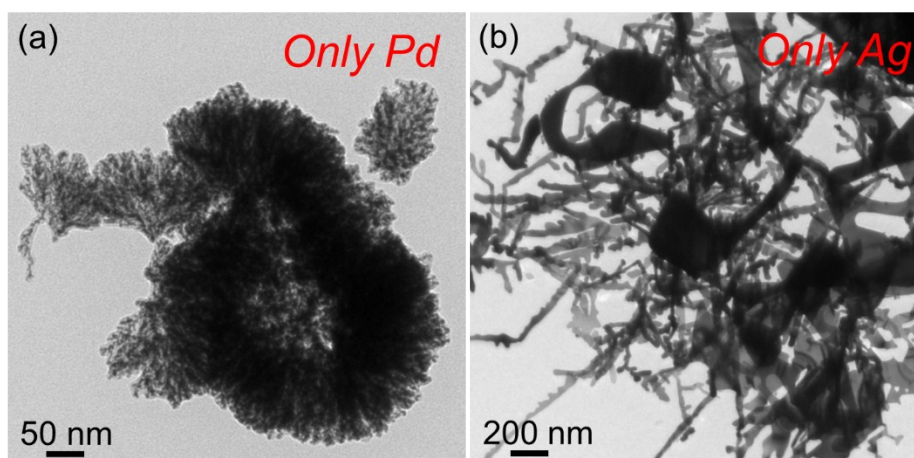

**Fig. S5** TEM images of 3D dandelion-like tiny Pd nanodendrites (Pd NDs) and 2D Ag nanobelts (Ag NBs).

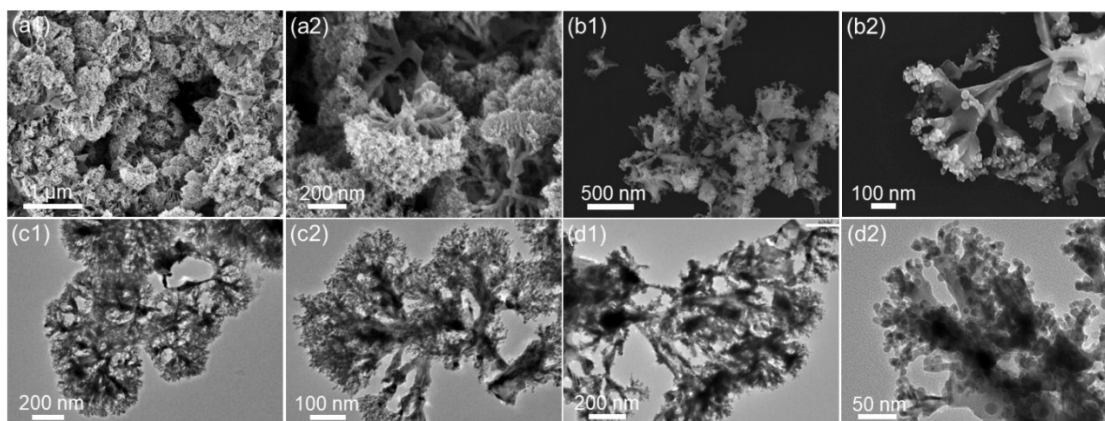

**Fig. S6** SEM images of (a)  $\text{Pd}_1\text{Ag}_1$  NTs and (b)  $\text{Pd}_1\text{Ag}_3$  NTs, TEM images of (c)  $\text{Pd}_1\text{Ag}_1$  NTs and (d)  $\text{Pd}_1\text{Ag}_3$  NTs.

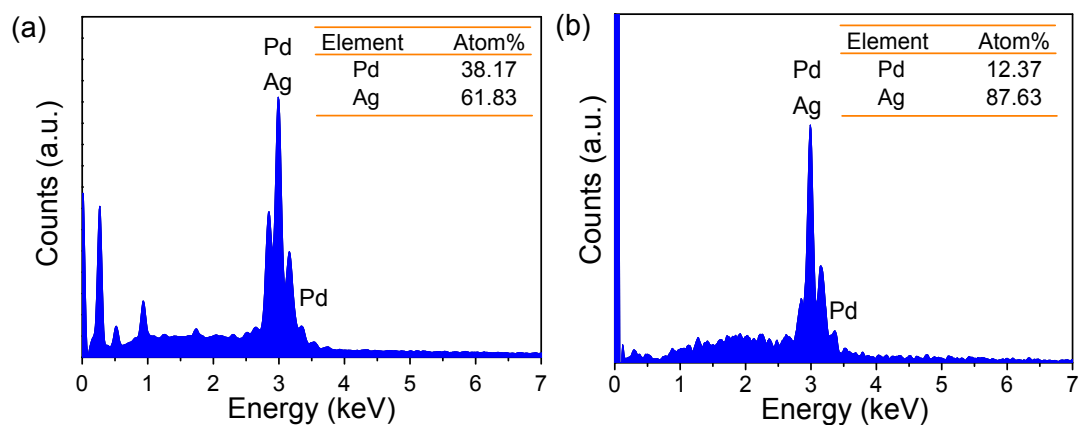

**Fig. S7** EDX spectra of Pd<sub>1</sub>Ag<sub>1</sub> NTs and Pd<sub>1</sub>Ag<sub>3</sub> NTs.

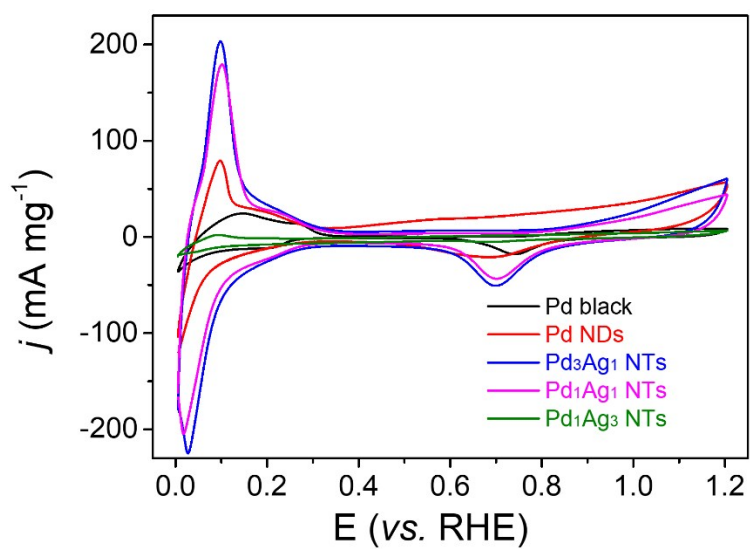

**Fig. S8** Mass-normalized CV curves of the catalysts in N<sub>2</sub>-saturated 0.5 M H<sub>2</sub>SO<sub>4</sub> solution under a sweep rate of 50 mV s<sup>-1</sup>.

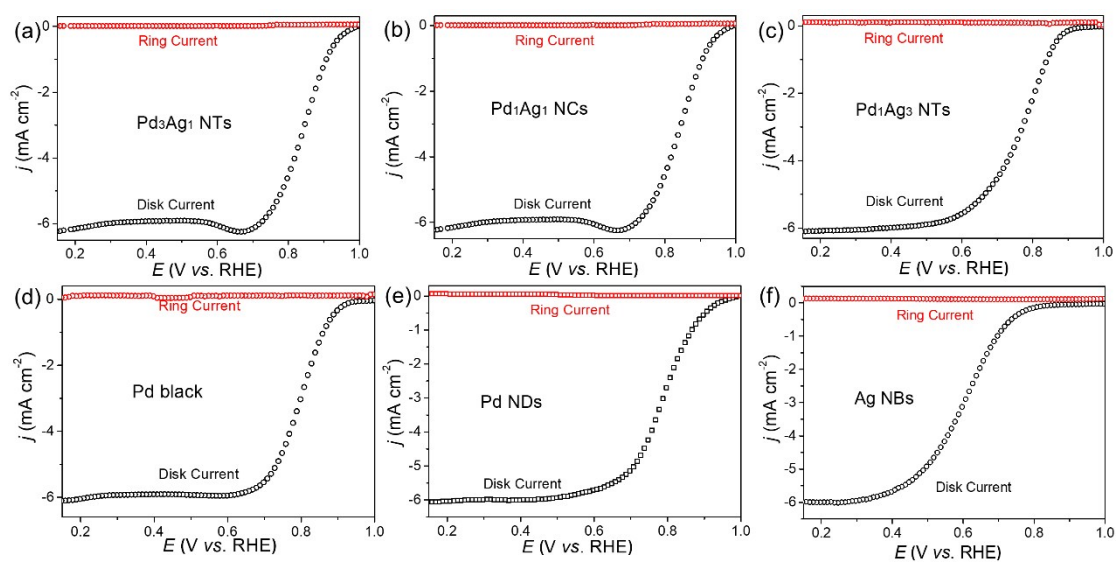

**Fig. S9** RRDE curves for the ORR of catalysts: (a) Pd<sub>3</sub>Ag<sub>1</sub> NTs, (b) Pd<sub>1</sub>Ag<sub>1</sub> NTs, (c) Pd<sub>1</sub>Ag<sub>3</sub> NTs, (d) Pd black, (e) Pd NDs and (f) Ag NBs.

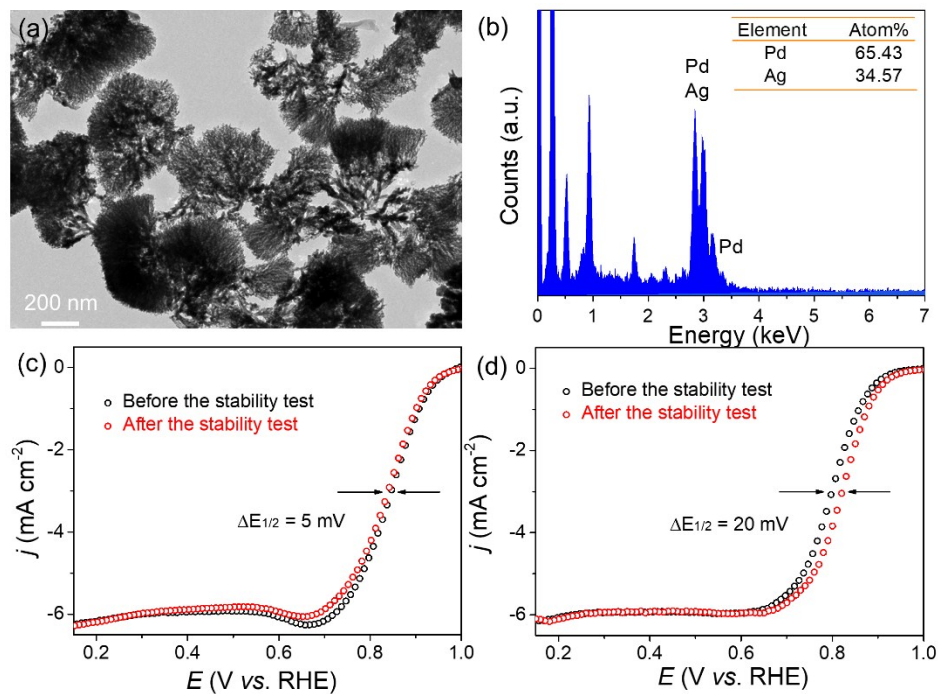

**Fig. S10** (a) TEM image and (b) EDX spectrum of Pd<sub>3</sub>Ag<sub>1</sub> NTs acquired after the chronoamperometric measurements in O<sub>2</sub>-saturated 0.1 M KOH, ORR performance of (c) Pd<sub>3</sub>Ag<sub>1</sub> NTs, (d) commercial Pd black before and after the stability test.

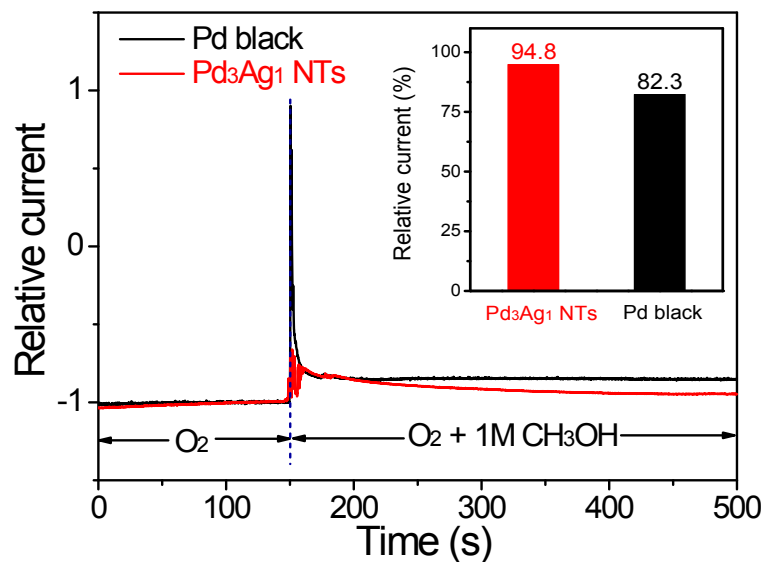

**Fig. S11** Comparison of methanol resistance by chronoamperometric measurements at 0.5 V in O<sub>2</sub>-saturated 0.1 M KOH (percentage of current retained vs. operation time).

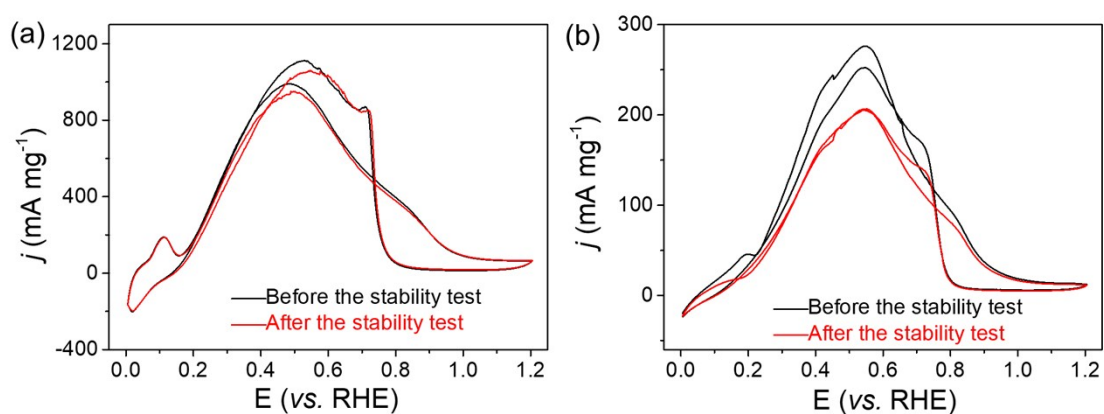

**Fig. S12** FAOR performance of (c) Pd<sub>3</sub>Ag<sub>1</sub> NTs, (d) commercial Pd black before and after the stability test.
